# Supplementary material
Source: publisher site journal article supplement (https://www.dovepress.com/article/363777)
Supplement: Supplementary file 1 [file get_supplementary_file.php]

**Supplementary information**

**Self-Assembled Nano-Peptide Hydrogels with Human Umbilical Cord Mesenchymal Stem Cell Spheroids Accelerate Diabetic Skin Wound Healing by Inhibiting Inflammation and Promoting Angiogenesis**

Junshuai Xue1, Nianfeng Sun2*, Yang Liu3*.

1 Department of General Surgery, Qilu Hospital of Shandong University, Jinan City, Shandong Province, China.

2* Women's and children's Hospital Affiliated to Qingdao University，Qingdao，266001，China.

3* Department of General Surgery, Vascular Surgery, Qilu Hospital of Shandong University, Jinan City, Shandong Province, China.

*Corresponding author:

**Nianfeng Sun**. Tel: +86 18561810688; E-mail: sunnianfeng@126.com; Postcode: 266001.

**Yang Liu**. Tel: +86 18560088317; E-mail: liuyang_sdu@126.com; Postcode:250012.


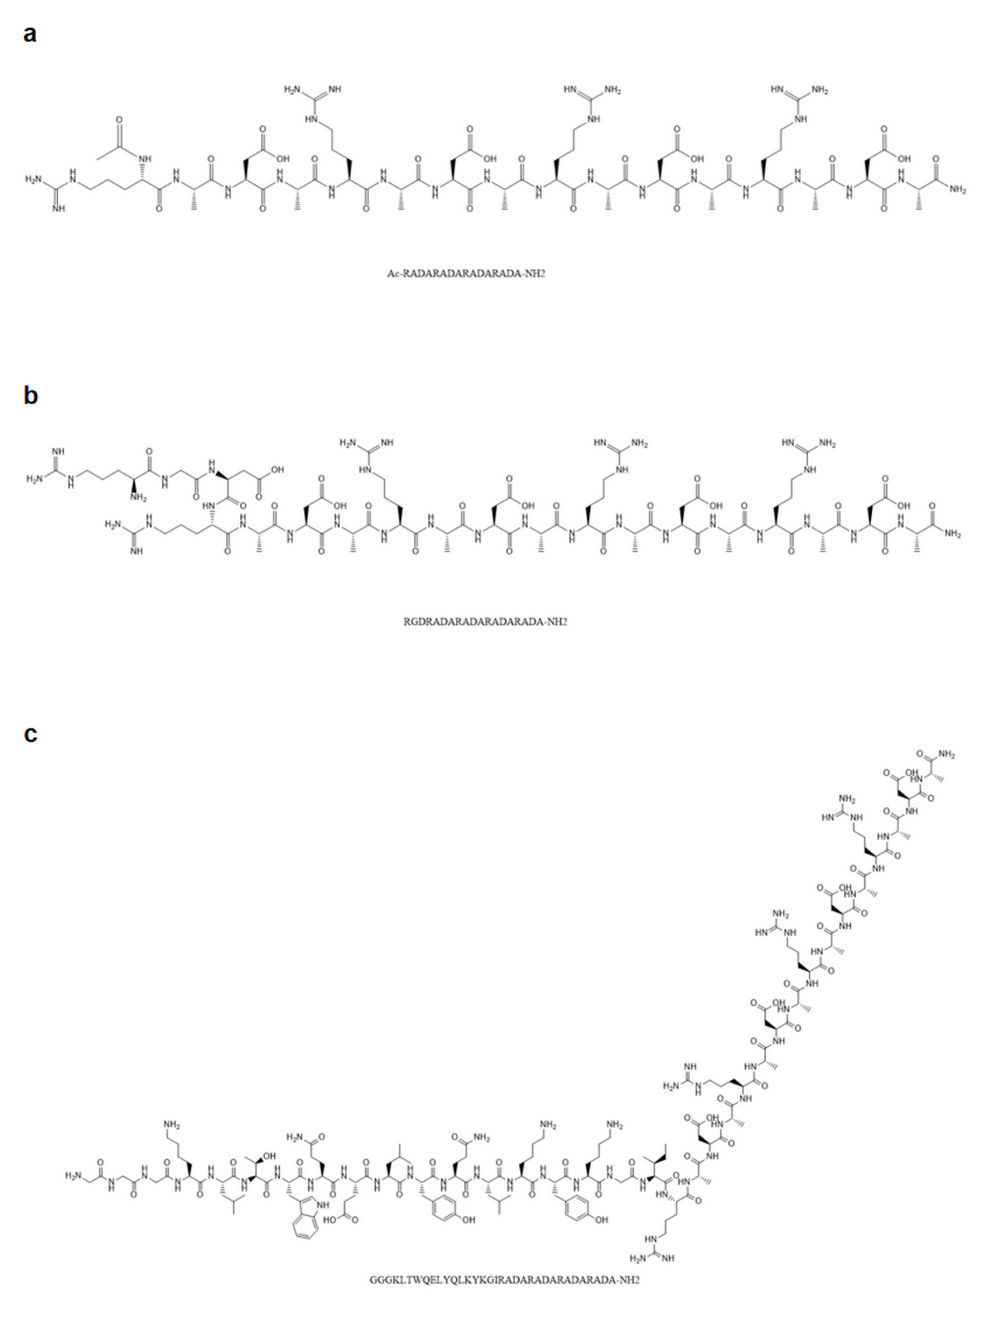


Supplementary Figure 1. The structure of three peptide sequences. a) RADA16-I, b) RGD, and c) KLT.
